# Supplementary material for: Cardiac Revascularization in Specialty and General Hospitals
Source: Atypon-hosted journal article supplement (doi:10.1056/nejmsa042325), 2005-04-06
Supplement: 1454sa1.pdf [file 1454sa1.pdf]

## Supplementary Appendix

This appendix has been provided by the authors to give readers additional information about their work.

Supplement to: Cram P, Rosenthal GE, Vaughan-Sarrazin MS. Cardiac revascularization in specialty and general hospitals. *N Engl J Med* 2005;352:1454-62.

WEB ONLY APPENDIX 1: Specialty cardiac hospitals

| Hospital Name                 | City, State       |
|-------------------------------|-------------------|
| Lutheran Heart Hospital       | Mesa, AZ          |
| Arizona Heart Hospital        | Phoenix, AZ       |
| Tucson Heart Hospital         | Tucson, AZ        |
| The Heart Hospital            | Rancho Mirage, CA |
| Bakersfield Heart Hospital    | Bakersfield, CA   |
| Heart Hospital of Austin      | Austin, TX        |
| MC Allen Heart Hospital       | Mc Allen, TX      |
| Arkansas Heart Hospital       | Little Rock, AR   |
| The Miami Heart Institute*    | Miami, FL         |
| Kansas Heart Hospital         | Wichita, KS       |
| Deborah Heart and Lung Center | Browns Mills, NJ  |
| Heart Hospital of New Mexico  | Albuquerque, NM   |

---

\* Merged with Mount Sinai Medical Center in 2001

|                                        |                 |
|----------------------------------------|-----------------|
| St. Francis Hospital/ The Heart Center | Roslyn, NY      |
| Dayton Heart Hospital                  | Dayton, OH      |
| Heart Hospital of South Dakota, LLC    | Sioux Falls, SD |

WEB ONLY APPENDIX 2: Independent predictors of 30-day or hospital mortality for

percutaneous coronary interventions (PCI), identified using stepwise logistic regression \*

| Risk Factor  | Odds Ratio (95% CI) | P value |
|--------------|---------------------|---------|
| Demographics |                     |         |
| Age          |                     |         |
| 70-74        | 1.18 (0.99-1.41)    | .06     |
| 75-79        | 1.27 (1.07-1.50)    | .007    |
| 80-84        | 1.76 (1.47-2.12)    | <.001   |
| 85-89        | 2.60 (2.04-3.30)    | <.001   |
| >90          | 3.00 (2.06-4.38)    | <.001   |
| Race         |                     |         |

---

\* In the risk adjustment model, age was expressed as five indicator variables (70-74, 75-79, 80-84, 85-89, 90 years and older), with a referent category of 65-69 years. Race was expressed using two indicator variables for patients who were classified in the database as either "black" or "other non-white race." Surgical priority was expressed using two indicator variables for emergent and urgent admissions, relative to elective admissions. Admission source was expressed as indicator variables for patients transferred to the hospital from another acute-care facility and patients admitted through the emergency department, with a referent category that primarily included patients referred by a physician.

|                                          |                  |       |
|------------------------------------------|------------------|-------|
| Black                                    | 0.84 (0.60-1.18) | .32   |
| Other nonwhite                           | 0.92 (0.75-1.13) | .45   |
| Female sex                               | 1.10 (0.95-1.26) | .20   |
| Median Income                            | 0.99 (0.99-0.99) | <.001 |
| Comorbid conditions                      |                  |       |
| Congestive heart failure                 | 2.80 (2.40-3.27) | <.001 |
| Neurologic disease                       | 3.08 (2.32-4.10) | <.001 |
| Chronic renal failure                    | 2.58 (2.06-3.24) | <.001 |
| Chronic obstructive pulmonary<br>disease | 1.54 (1.29-1.84) | <.001 |
| Cerebro-vascular disease                 | 1.98 (1.56-2.51) | <.001 |
| Coagulopathy                             | 3.34 (2.40-4.67) | <.001 |
| Weight loss                              | 4.64 (2.70-7.99) | <.001 |
| Valvular heart disease                   | 1.26 (1.06-1.50) | .01   |

|                                                              |                  |       |
|--------------------------------------------------------------|------------------|-------|
| Liver Disease                                                | 2.53 (1.12-5.74) | .03   |
| Metastatic disease                                           | 4.12 (2.30-7.31) | <.001 |
| Surgical priority                                            |                  |       |
| Urgent                                                       | 1.15 (1.93-1.44) | .18   |
| Emergent                                                     | 1.36 (1.07-1.82) | .37   |
| High-risk clinical conditions                                |                  |       |
| Primary Diagnosis MI                                         | 2.90 (2.50-3.38) | <.001 |
| Aortic balloon pump                                          | 2.62 (1.36-5.08) | .008  |
| Previous CABG                                                | 0.68 (0.52-0.87) | .003  |
| Year of discharge (compared w/<br>2000)                      | 0.90 (0.80-1.02) | .10   |
| Admission as transfer from<br>another acute<br>care facility | 1.05 (0.87-1.27) | .61   |

|                                        |                  |     |
|----------------------------------------|------------------|-----|
| Admission from emergency<br>department | 1.08 (0.83-1.42) | .53 |
|----------------------------------------|------------------|-----|

WEB ONLY APPENDIX 3: Independent predictors of 30-day or hospital mortality for coronary artery bypass graft surgery (CABG), identified using stepwise logistic regression \*

| Risk Factor  | Odds Ratio(95% CI) | P value |
|--------------|--------------------|---------|
| Demographics |                    |         |
| Age          |                    |         |
| 70-74        | 1.24 (1.05-1.47)   | .01     |
| 75-79        | 1.43 (1.22-1.68)   | <.001   |
| 80-84        | 1.89 (1.61-2.23)   | <.001   |
| 85-89        | 2.88 (2.33-3.56)   | <.001   |
| >90          | 2.59 (1.60-4.18)   | <.001   |
| Race         |                    |         |

---

\* In the risk adjustment model, age was expressed as five indicator variables (70-74, 75-79, 80-84, 85-89, 90 years and older), with a referent category of 65-69 years. Race was expressed using two indicator variables for patients who were classified in the database as either "black" or "other non-white race." Surgical priority was expressed using two indicator variables for emergent and urgent admissions, relative to elective admissions. Admission source was expressed as indicator variables for patients transferred to the hospital from another acute-care facility and patients admitted through the emergency department, with a referent category that primarily included patients referred by a physician.

|                                       |                  |       |
|---------------------------------------|------------------|-------|
| Black                                 | 1.42 (0.72—1.00) | .05   |
| Other non-white                       | 0.99 (0.72-1.37) | .93   |
| Female sex                            | 1.41 (1.26-1.59) | <.001 |
| Median Income                         | 0.99 (0.99-0.99) | <.001 |
| Comorbid conditions                   |                  |       |
| Congestive heart failure              | 1.81 (1.58-2.08) | <.001 |
| Neurologic disease                    | 3.17 (2.46-4.09) | <.001 |
| Chronic renal failure                 | 2.43 (2.01-2.93) | <.001 |
| Chronic obstructive pulmonary disease | 1.27 (1.10-1.47) | .001  |
| Cerebro-vascular disease              | 1.66 (1.43-1.92) | <.001 |
| Coagulopathy                          | 2.60 (2.10-3.21) | <.001 |
| Weight loss                           | 2.47 (1.70-3.59) | <.001 |
| Valvular heart disease                | 1.46 (1.20-1.77) | <.001 |

|                                                 |                  |       |
|-------------------------------------------------|------------------|-------|
| Liver Disease                                   | 4.21 (2.50-7.09) | <.001 |
| Peripheral vascular disease                     | 1.28 (1.08-1.50) | .003  |
| Surgical priority                               |                  |       |
| Urgent                                          | 1.19 (1.04-1.39) | .02   |
| Emergent                                        | 1.17 (1.96-1.43) | .13   |
| High-risk clinical conditions                   |                  |       |
| Primary diagnosis MI                            | 1.57 (1.40-1.78) | <.001 |
| PCI on the same day as CABG                     | 2.47 (1.45-4.24) | .001  |
| Valve replacement during CABG                   | 1.34 (1.08-1.67) | .009  |
| Cardiac catheterization on the same day as CABG | 1.45 (1.19-1.77) | <.001 |
| Year of discharge compared with 2000            | 0.99 (0.88-1.13) | .98   |

|                                                              |                  |     |
|--------------------------------------------------------------|------------------|-----|
| Admission as transfer from<br>another<br>acute care facility | 1.17 (0.97-1.42) | .10 |
| Admission from emergency<br>department                       | 1.13 (0.89-1.43) | .33 |
